# Supplementary material for: Finding Long-COVID: Temporal Topic Modeling of Electronic Health Records from the N3C and RECOVER Programs
Source: PubMed Central journal article supplement (PMC11213052; doi:10.1101/2023.09.11.23295259), 2024-06-11
Supplement: NIHPP2023.09.11.23295259v2-supplement-1.pdf [file NIHPP2023.09.11.23295259v2-supplement-1.pdf]

# Supplemental Figures

## Suppl. Figure 1

Consort diagram illustrating stratification of patients into sets and cohorts, number of unique sites represented by those groups, and how each is used in analysis. The site quality filter removed sites with inpatient serum creatinine or white blood cell count results for fewer than 25% of patients, the site U09.9 filter removed patients from sites with no U09.9 diagnoses, and filter variables are as described for specific tests (see Suppl. Methods).

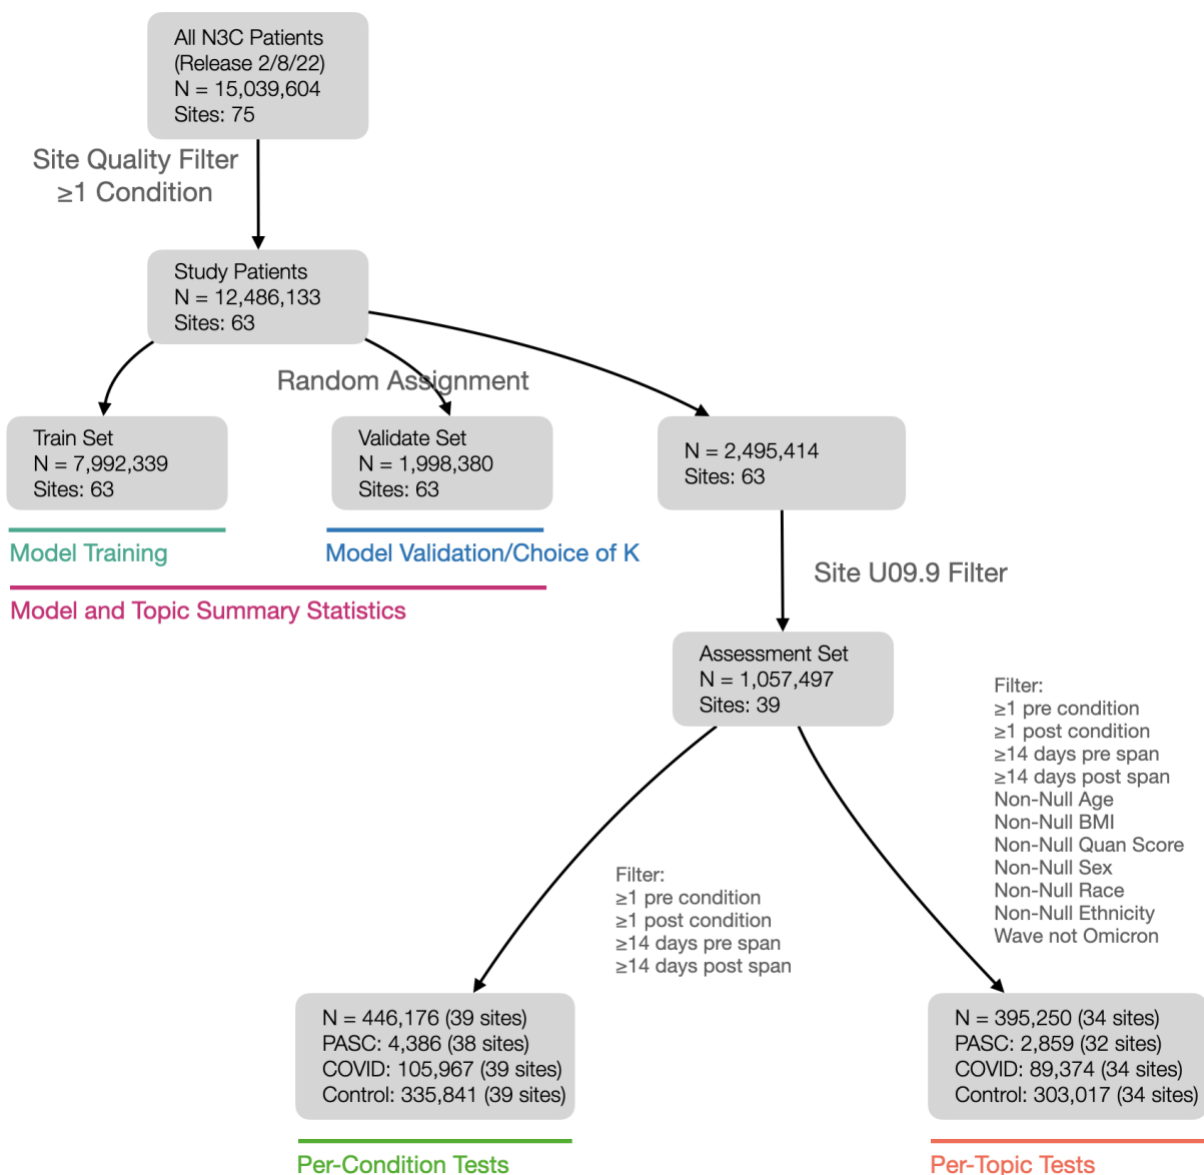

## Suppl. Figure 2

Mean topic coherence scores for LDA models varying the number of topics generated (K). Topic coherences are computed as intrinsic UCI Coherence<sup>30</sup> using the top 20 terms per topic. UCI coherence evaluates, for all term pairs amongst these top 20, how frequently they occur together in patient histories compared to the expectation assuming terms occur independently, on the validation data set. K=300 was chosen as the final number of topics.

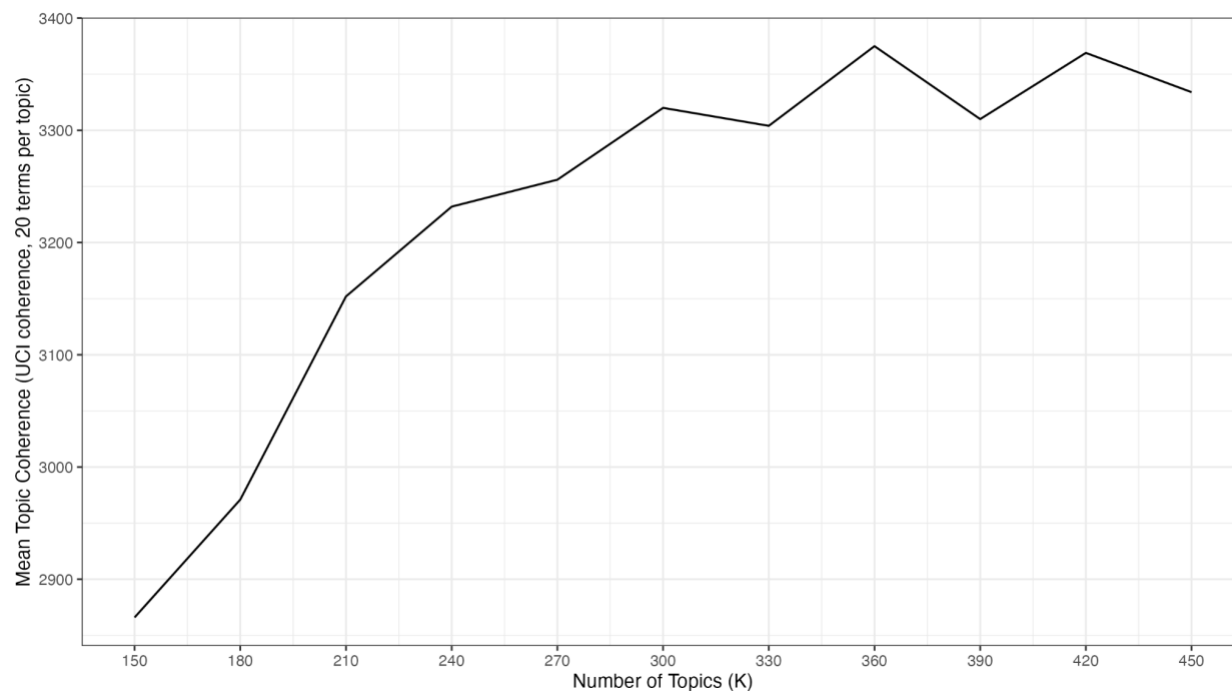

## Suppl. Figure 3

Full topic clouds for all 300 topics generated and visualizations of corresponding contrasts.

Available at <https://doi.org/10.5281/zenodo.11188766>.

## Suppl. Figure 4

Topic/topic dissimilarity as Jensen-Shannon Distance. Topic self-distances of 0 are not shown.

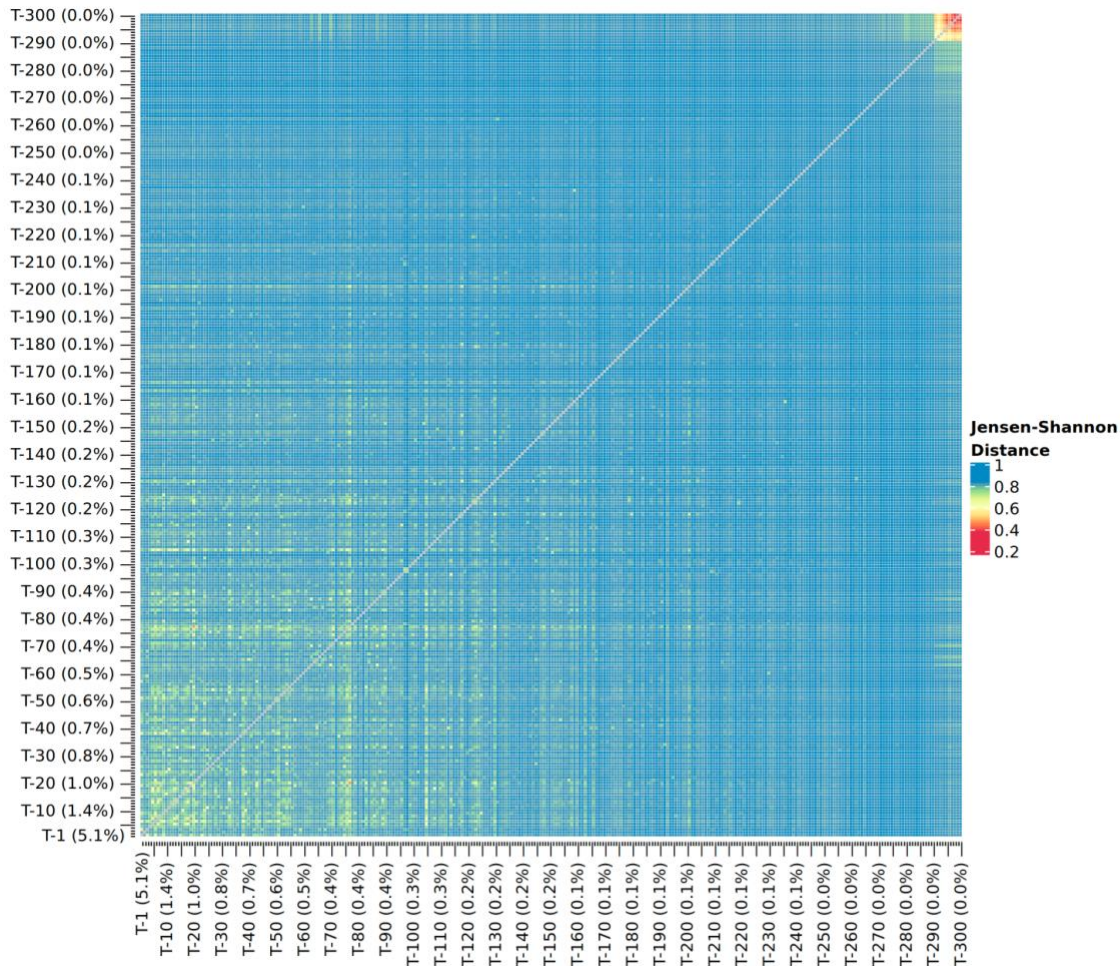

## Suppl. Figure 5

Histogram of topic coherence values.

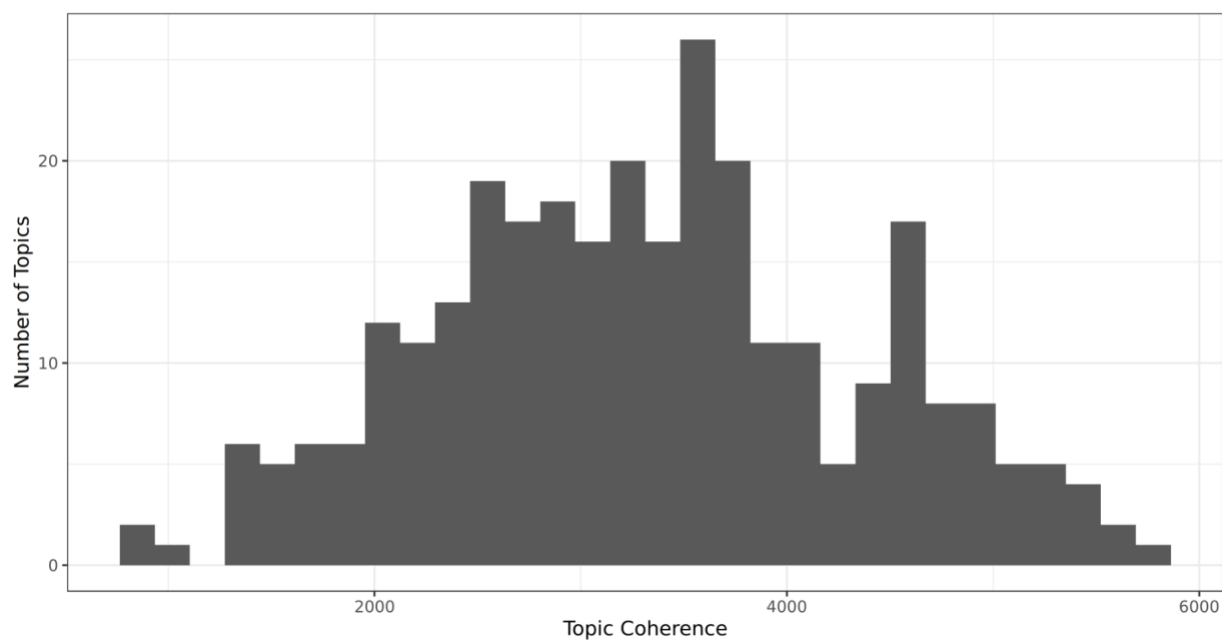

## Suppl. Figure 6

Mean UCI coherence scores per topic and contributing data site (ID anonymized). Site identifiers are masked, but labeled with the source common data model in use at the site.

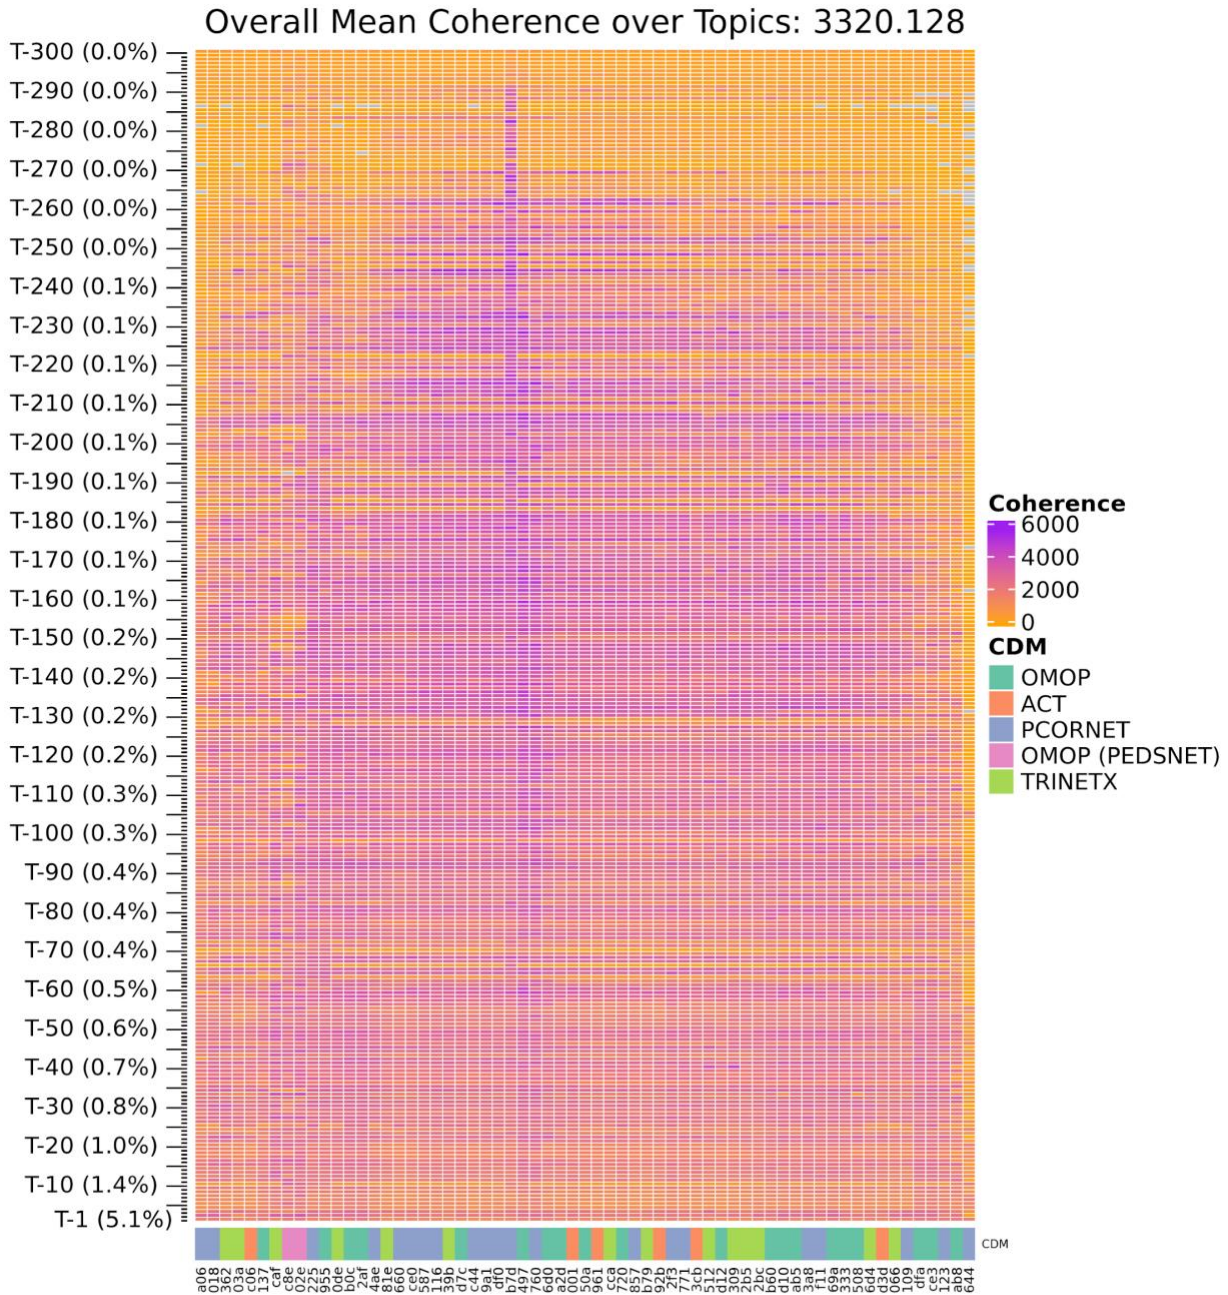

## Suppl. Figure 7

Relative usage of topics per contributing site (ID anonymized). For a given site and topic, relative usage is computed as the sum of assigned weights to that topic for patients from that site divided by the number of patients, representing a distribution over topics per site.

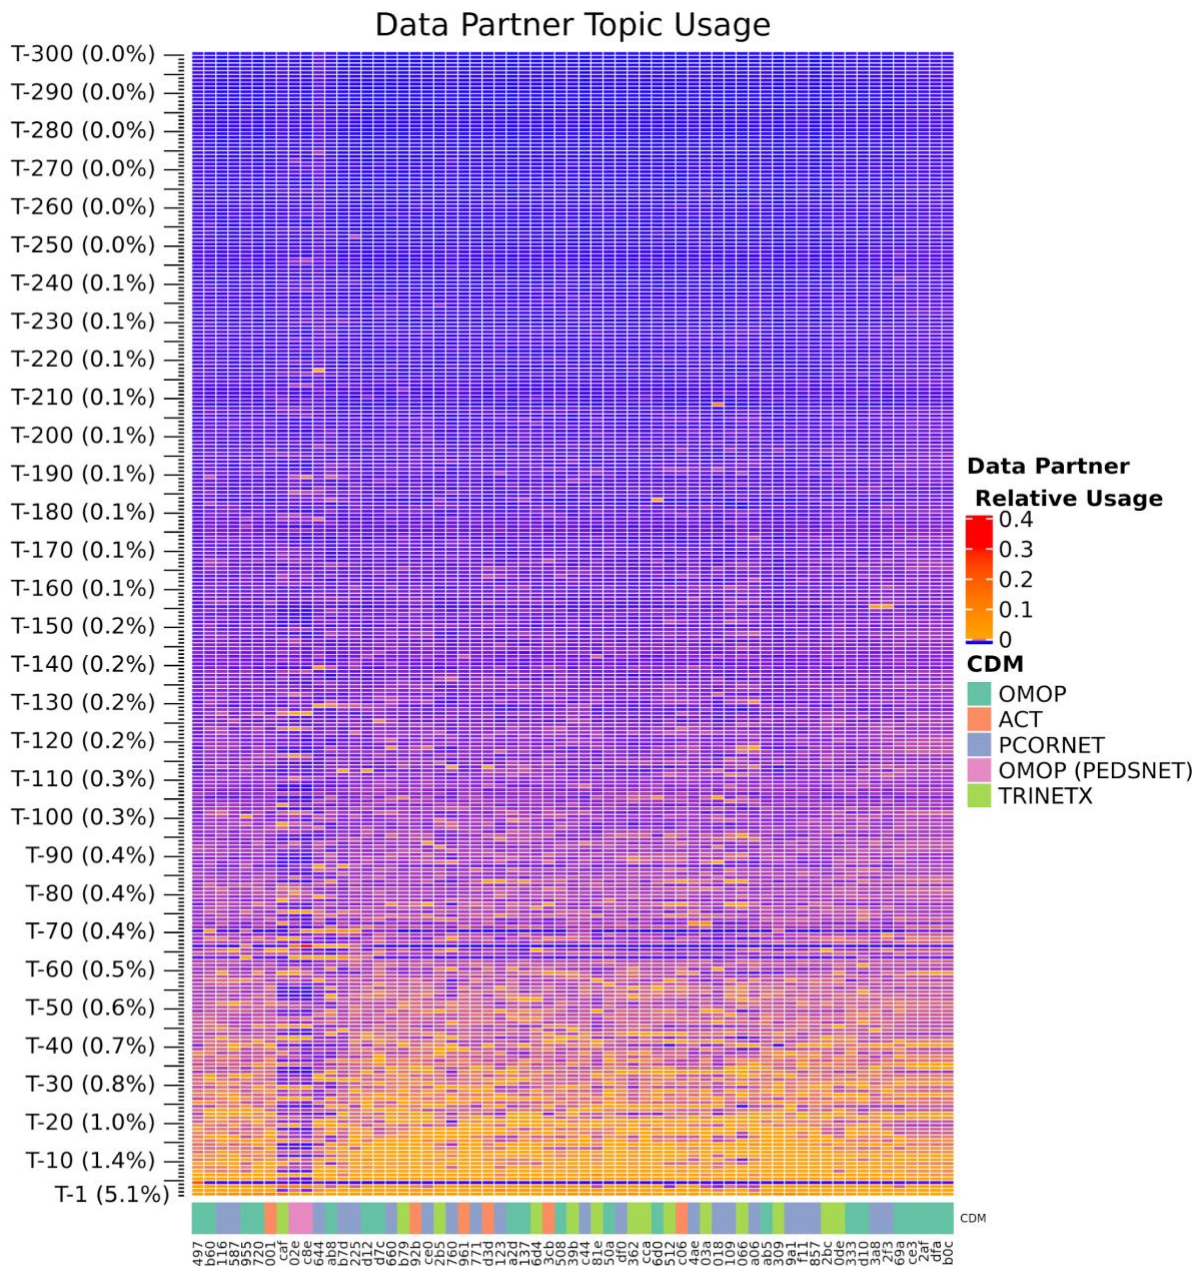

## Suppl. Figure 8

Per-topic coherence (horizontal axis) vs. contrast effect sizes (log-odds scale, vertical axis) for tested groups (panels) in PASC vs. Control (top) and COVID vs. Control (bottom) contrasts. Labeled topics are those with statistically significant log-odds differences of  $>1$  or  $<-1$  (OR  $>2$  or  $<0.5$ ). Points are sized and colored according to mean topic usage for the group and cohort in the post-infection phase, with blue points representing Control patients and red points representing PASC (top) or COVID (bottom) patients.

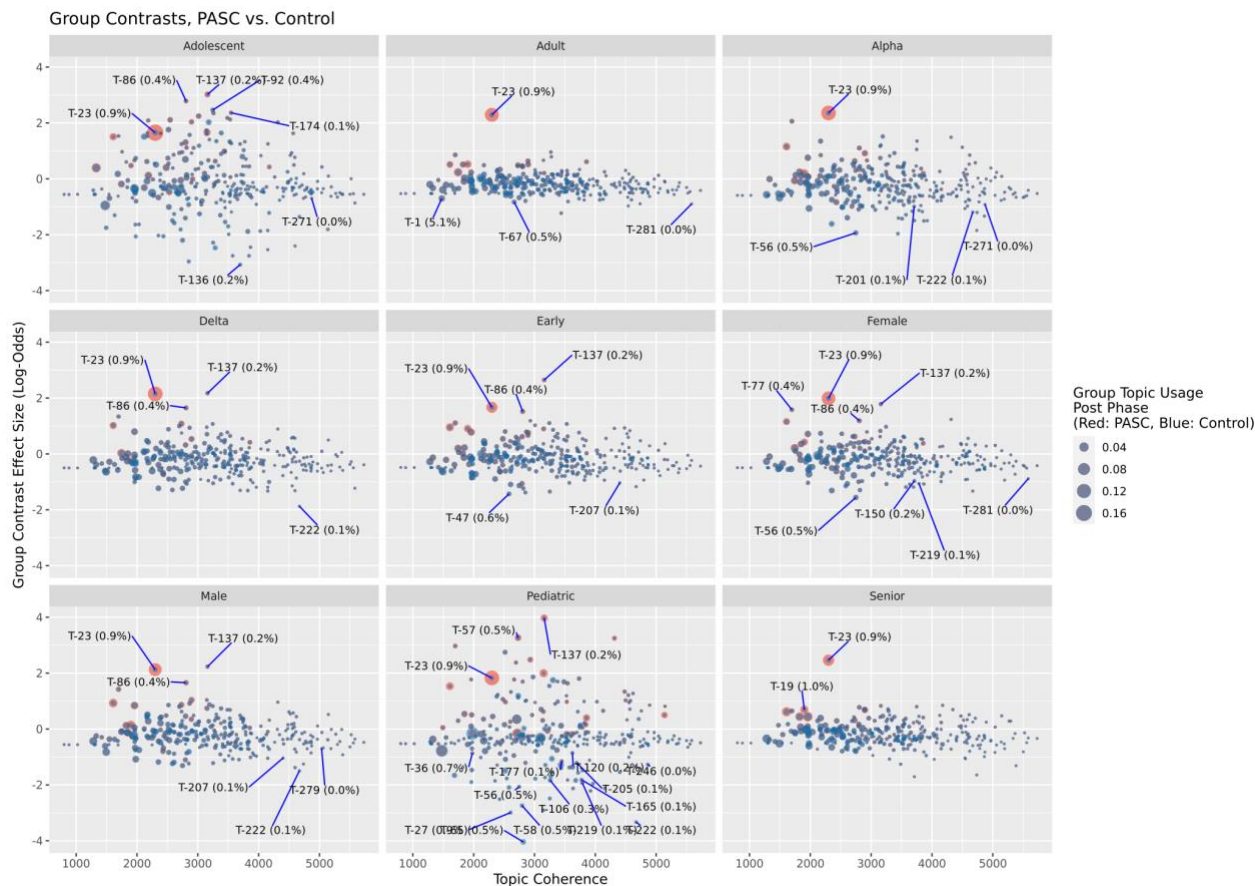

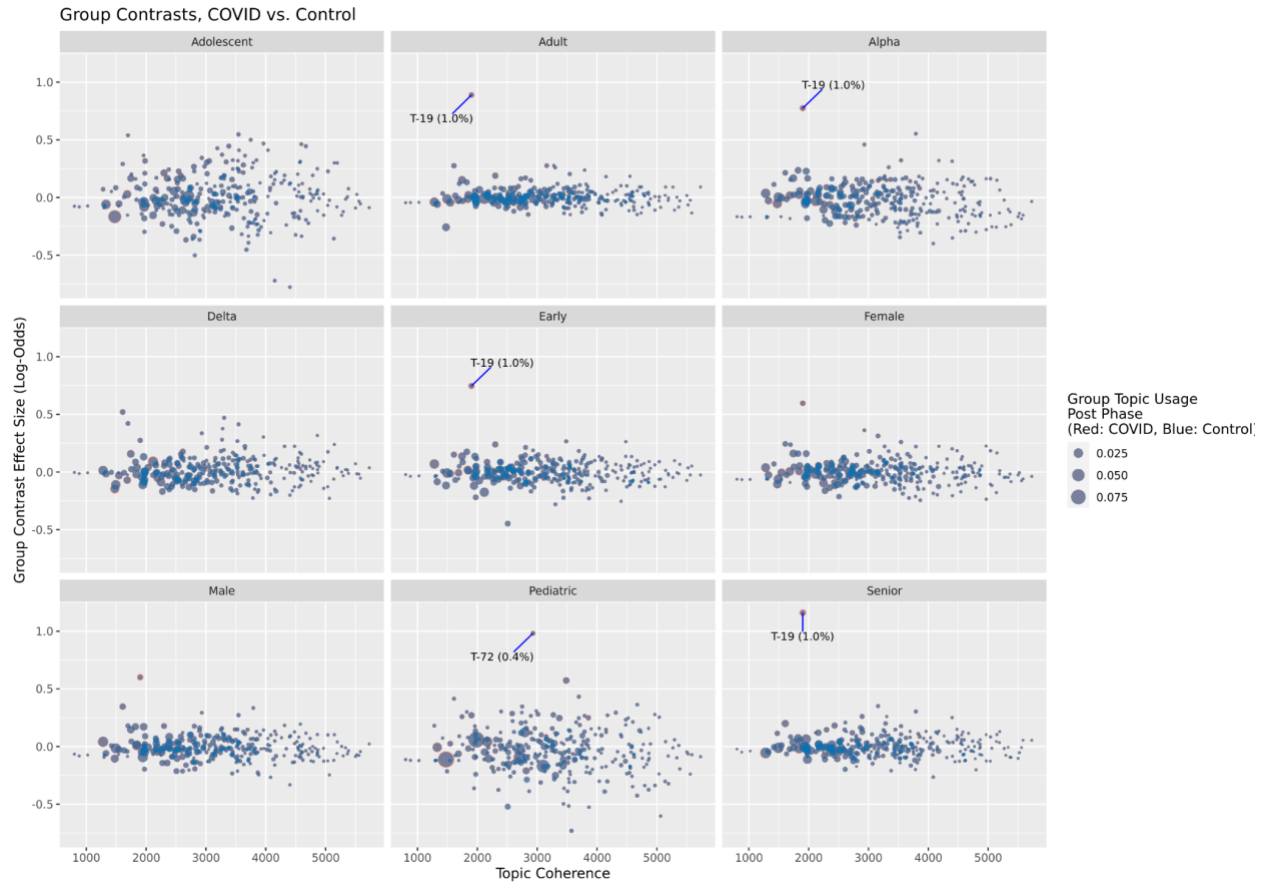



## Suppl. Figure 9

Results for Figures 4 (top) and 5 (bottom) for models with and without site-level covariates of topic usage, percentage of PASC patients, and source common data model.

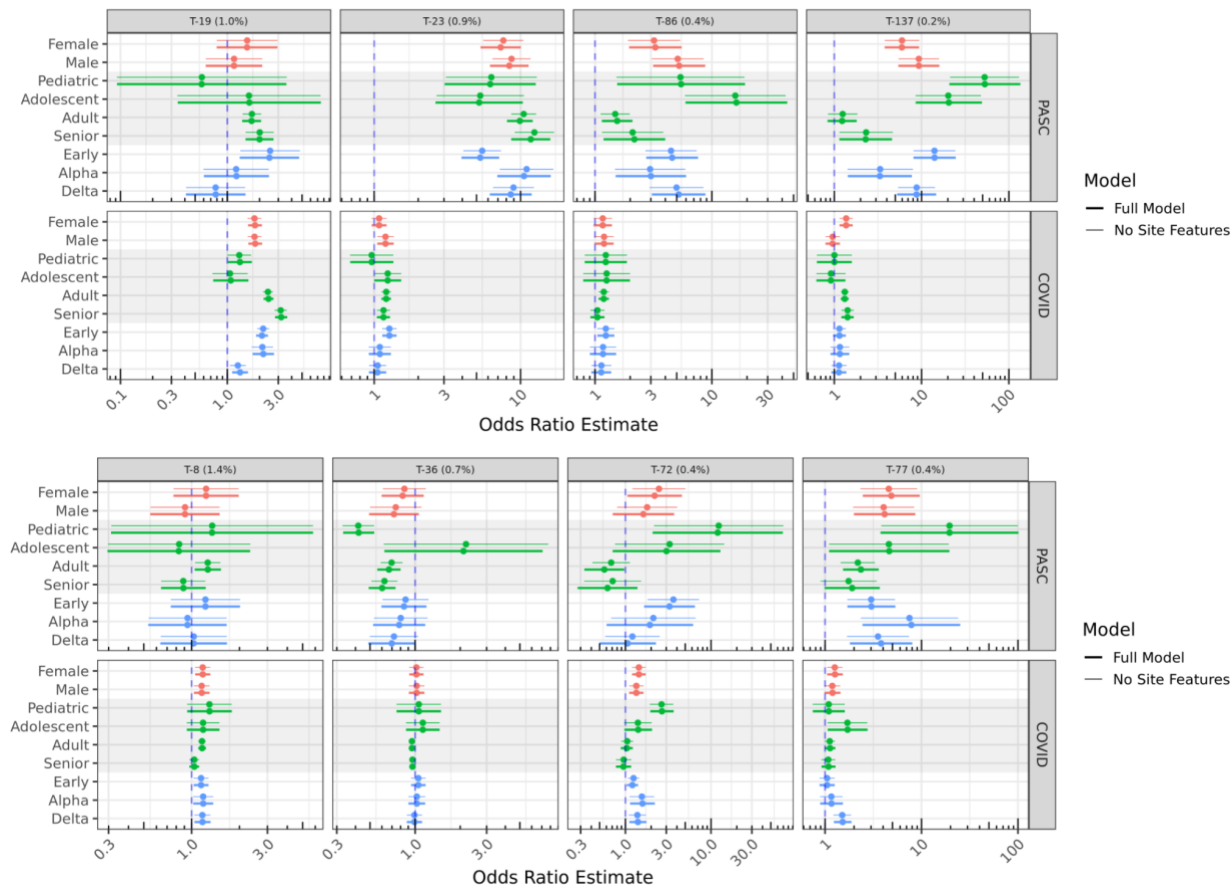

# Supplemental Methods

## Minimal Site Quality Filters

EHR data from the National COVID Cohort Collaborative (N3C), released Aug. 2, 2022 represent records from 75 contributing sites. All analyses were restricted to data from 63 sites passing minimal quality checks: sites were excluded if greater than 25% of inpatient visits were not accompanied by serum creatinine or white blood cell count measures (N=11), or if greater than 5% of COVID-19 confirmed patients were indicated as inpatient continuously for 200 or more days prior to and including their confirmed COVID-19 date (as potential long-term care facilities, N=1).

## Model Training

Model training utilized the online Latent Dirichlet Allocation (LDA) method of Hoffman et al.<sup>24</sup> as implemented in Apache Spark (pyspark.ml.clustering.LDA) version 3.2.1.<sup>29</sup> Parameters used include k (the number of topics, 300 in the final model), seed (42, a random seed to initialize the training), and maxIter (200, providing 10 passes over the training data in batches of 5% each). Determination of condition-topic and topic-patient distributions were produced by the fitted LDA model.

## Topic Annotations

Each topic is annotated with three values: U, representing the relative usage of the topic by total weight assigned to patients (range 0-100%), H, a measure how uniformly the topic is used by N3C-contributing sites (range 0-1, with values closer to 0 being site-specific), and C, a measure of each topics' coherence compared to the mean over all topics. All three are computed over the training and validation sets.

U is computed as the sum over patients of the weight assigned to the topic, divided by the number of patients (which is also the total weight assigned over all topics).

H is computed as the information entropy of the relative usage of the topic across sites, normalized to a maximum value of 1.0 when the usage is uniformly distributed. Relative usage for a given site is computed as the total weight assigned to the topic for patients from the site, divided by the total number of patients from that site.

Per-topic coherence C is calculated for each topic using the UCI Coherence metric (see Model Validation below). These values are not meant to be interpreted on an absolute scale, but since they are normally distributed amongst topics (Suppl. Figure 4) we adjust them to z-scores for comparative use.

## Jensen-Shannon Distance

Jensen-Shannon Distance between topics  $t_i$  and  $t_j$  is a true metric and is defined as the square root of the Jensen-Shannon divergence:

$$\text{JS Distance}(t_i, t_j) = \sqrt{\frac{\sum_{c \in \text{terms}} c_{t_i} \log(c_{t_i}/M)}{2} + \frac{\sum_{c \in \text{terms}} c_{t_j} \log(c_{t_j}/M)}{2}},$$

where  $c_{t_x} = p(c|t_x)$  (the probability assigned to term  $c$  in topic  $t_x$ ) and  $M$  is  $(c_{t_i} + c_{t_j})/2$ .

## Topic Term Relevance

Term relevance provides a measure of term-topic-specificity, with values greater than zero indicating terms more likely for the topic than overall.<sup>33</sup> For term  $c_i$  and topic  $t_j$ , we define relevance as

$$\text{relevance}(c_i) = \ln \frac{p(c_i|t_j)}{p(c_i)}.$$

## Model Validation

UCI coherence for a given topic  $t_i$  is computed over the top N terms by probability for the topic, where we used  $N = 20$ . Letting  $T_i$  be the set of top 20 terms for  $t_i$ , a sum score is computed for each distinct pair of terms  $a$  and  $b$ , where the score for a given pair is the log of the measured probability of their occurring together in a patient compared to the joint probability assuming independence. To avoid undefined scores, 0 is used for pairs where the denominator is 0, and 1 is added to the joint probability.<sup>30</sup>

$$\text{Coherence}(t_i) = \sum_{b, c \in T_i, b < c} \begin{cases} \log_2 \left( \frac{1 + p(b \cap c | t_i)}{p(b | t_i) \cdot p(c | t_i)} \right) & \text{if } p(b | t_i) \cdot p(c | t_i) > 0 \\ 0 & \text{else} \end{cases}$$

Overall model quality was evaluated as the mean of coherence scores across topics, computed over the validation dataset only.

## Per-Condition Tests

All tests were performed in R v3.5.1.<sup>61</sup> As described in the main text, patients in the test data set were included for evaluation of new-onset conditions if they satisfied requirements for being in

the PASC, COVID, or Control cohorts. The top 20 conditions from each topic with relevance score > 0 were evaluated by considering only patients without the condition in the pre phase, comparing counts of PASC (and COVID) patients later indicated and not indicated for the post phase, to those same counts in the Control cohort. R's `fisher.test()` was used with `simulate.p.value = TRUE` to support tests where counts are large.<sup>34</sup> Reported p values were multiple-test corrected using Bonferroni's method.

## BMI and Quan Comorbidity Scores

Patient BMI values used in modeling were the maximum over those reported after Jan. 1 2018, or the maximum of those computed as  $\text{weight}/(\text{height}^2)$  if no BMI measurement was directly available. Weight values outside 5kg–300kg and height values outside 0.6m–2.43m were excluded from BMI calculations. Quan comorbidity scores<sup>40</sup> were computed from available source ICD code prefixes as shown in Suppl. Table 7.

## Topic Regression Tests

Regression models were fitted using `geepack` v1.3.9,<sup>38</sup> with contrasts computed using `emmeans` v1.8.9.<sup>62</sup> Individual patient histories defined by their pre- and post- phase data were assigned topic probability distributions by the fitted LDA model. For each topic, we fitted a logistic regression model with outcome variable being the model-assigned topic probability as the trial success rate with equal weight, from covariates phase (pre or post), cohort (PASC, COVID, or Control), patient life stage and wave of the index date (see main Methods), sex, race, Quan comorbidity score, BMI, source CDM (PCORnet, ACT, OMOP, TrinetX, and OMOP (PedsNet)). To account for potential differential usage of PASC labels or topics, we also included percentage of patients at the given patients' site in the PASC cohort, and usage of the topic by the patients' site relative to all sites (summing to 1.0 across sites). Interactions were included for terms of interest for contrasts using the R/`geepack` formula `topic_probability ~ phase * cohort * (index_wave + sex + life_stage) + site_percent_pasc * phase * cohort + site_relative_topic_usage + race + quan_score + bmi + cdm`. Only patients from the assessment set with complete information for all variables were included.

# Supplemental Tables

## Suppl. Table 1

OMOP Concepts excluded from model training, evaluation, and testing.

| Concept Name                                    | OMOP Concept Id |
|-------------------------------------------------|-----------------|
| No matching concept                             | 0               |
| Clinical finding                                | 441840          |
| COVID-19                                        | 37311061        |
| Viral disease                                   | 440029          |
| Disease due to coronaviridae                    | 4100065         |
| Sexually abstinent                              | 764423          |
| Single current sexual partner                   | 4043045         |
| New sexual partner                              | 44813701        |
| Sexually active with men                        | 43021202        |
| Single historical sexual partner                | 43021216        |
| Number of current sexual partners - finding     | 4276728         |
| Bigamy                                          | 4336540         |
| Sexual activity - two to three times per month  | 4012347         |
| Sexual activity - two to three times per week   | 4012202         |
| Finding of number of historical sexual partners | 43021214        |
| No longer sexually active                       | 4043041         |
| Multiple current sexual partners                | 4038723         |
| Sexually active with transgender person         | 43021204        |
| Number of sexual partners - finding             | 4269990         |
| Satisfactory sexual experience                  | 44811373        |
| Sexual activity - daily                         | 4012377         |
| Currently not sexually active                   | 4012376         |
| Never been sexually active                      | 4145811         |
| Fornication                                     | 4031991         |
| Sexual activity - monthly                       | 4012348         |
| Sexual activity - weekly                        | 4012203         |
| Sexual contact with high risk partner           | 44789379        |
| Finding of frequency of sexual activity         | 4188013         |
| Engages in sexual activity outside marriage     | 43021163        |
| Sexually active with women                      | 43021203        |
| Purposely unmarried and sexually abstinent      | 43021238        |
| Sex within a relationship only                  | 4021660         |
| Sexually active in last month                   | 37017764        |
| Sexually active                                 | 4043042         |
| Finding relating to sexual activity             | 4114865         |
| Sexually active in last year                    | 37017763        |
| Engages in sexual activity before marriage      | 43021162        |
| Sexually active in last six months              | 37017762        |
| Multiple historical sexual partners             | 43021215        |

## Suppl. Table 2

OMOP Concepts describing COVID-19 PCR or Antigen tests.

| Concept Name                                                                                                                | OMOP Concept Id |
|-----------------------------------------------------------------------------------------------------------------------------|-----------------|
| SARS-CoV-2 (COVID-19) N gene [Presence] in Respiratory specimen by Nucleic acid amplification using CDC primer-probe set N2 | 586525          |
| SARS-CoV-2 (COVID-19) RdRp gene [Presence] in Saliva (oral fluid) by NAA with probe detection                               | 36032174        |
| SARS-related coronavirus RNA [Presence] in Specimen by NAA with probe detection                                             | 723472          |
| SARS-CoV-2 (COVID-19) N gene [Cycle Threshold #] in Specimen by Nucleic acid amplification using CDC primer-probe set N2    | 706155          |
| SARS-CoV-2 (COVID-19) S gene [Cycle Threshold #] in Specimen by NAA with probe detection                                    | 723468          |
| SARS-CoV-2 (COVID-19) N gene [# /volume] (viral load) in Respiratory specimen by NAA with probe detection                   | 36661370        |
| SARS-CoV-2 (COVID-19) S gene [Cycle Threshold #] in Respiratory specimen by NAA with probe detection                        | 723467          |
| SARS-CoV-2 (COVID-19) N gene [Presence] in Serum or Plasma by NAA with probe detection                                      | 586520          |
| SARS-CoV-2 (COVID-19) S gene [Presence] in Respiratory specimen by NAA with probe detection                                 | 723465          |
| SARS-CoV-2 (COVID-19) [Presence] in Specimen by Organism specific culture                                                   | 586516          |
| SARS-CoV-2 (COVID-19) N gene [Cycle Threshold #] in Specimen by NAA with probe detection                                    | 706167          |
| SARS-CoV-2 (COVID-19) Ag [Presence] in Respiratory specimen by Rapid immunoassay                                            | 723477          |
| SARS-CoV-2 (COVID-19) RNA [Log # /volume] (viral load) in Specimen by NAA with probe detection                              | 715262          |
| SARS-related coronavirus N gene [Cycle Threshold #] in Specimen by Nucleic acid amplification using CDC primer-probe set N3 | 706172          |
| SARS-CoV-2 (COVID-19) RNA [Presence] in Saliva (oral fluid) by NAA with probe detection                                     | 715260          |
| SARS-CoV-2 (COVID-19) S gene [Presence] in Serum or Plasma by NAA with probe detection                                      | 586519          |
| SARS-CoV-2 (COVID-19) ORF1ab region [Cycle Threshold #] in Respiratory specimen by NAA with probe detection                 | 723469          |
| SARS-CoV-2 (COVID-19) RNA [Cycle Threshold #] in Specimen by NAA with probe detection                                       | 586529          |
| SARS-related coronavirus E gene [Presence] in Respiratory specimen by NAA with probe detection                              | 586523          |
| SARS-CoV-2 (COVID-19) ORF1ab region [Presence] in Saliva (oral fluid) by NAA with probe detection                           | 36031506        |

| Concept Name                                                                                                               | OMOP Concept Id |
|----------------------------------------------------------------------------------------------------------------------------|-----------------|
| SARS-CoV-2 (COVID-19) S gene [Presence] in Specimen by NAA with probe detection                                            | 723466          |
| SARS-CoV-2 (COVID-19) RNA [Presence] in Nasopharynx by NAA with non-probe detection                                        | 723476          |
| SARS-CoV-2 (COVID-19) N gene [Presence] in Saliva (oral fluid) by Nucleic acid amplification using CDC primer-probe set N1 | 36032258        |
| SARS-CoV-2 (COVID-19) RNA [Presence] in Nasopharynx by NAA with probe detection                                            | 586526          |
| SARS-related coronavirus E gene [Presence] in Serum or Plasma by NAA with probe detection                                  | 586518          |
| SARS-CoV-2 (COVID-19) S gene [Presence] in Respiratory specimen by Sequencing                                              | 36031213        |
| SARS-CoV-2 (COVID-19) RNA [Presence] in Nose by NAA with probe detection                                                   | 757677          |
| SARS-CoV-2 (COVID-19) N gene [Presence] in Specimen by Nucleic acid amplification using CDC primer-probe set N2            | 706154          |
| SARS-CoV-2 (COVID-19) RNA panel - Respiratory specimen by NAA with probe detection                                         | 706158          |
| SARS-CoV-2 (COVID-19) N gene [Presence] in Respiratory specimen by NAA with probe detection                                | 706161          |
| SARS-CoV-2 (COVID-19) RdRp gene [Cycle Threshold #] in Specimen by NAA with probe detection                                | 723470          |
| SARS-CoV-2 (COVID-19) RdRp gene [Presence] in Lower respiratory specimen by NAA with probe detection                       | 36031652        |
| SARS-CoV-2 (COVID-19) N gene [Presence] in Saliva (oral fluid) by NAA with probe detection                                 | 36661378        |
| SARS-related coronavirus+MERS coronavirus RNA [Presence] in Respiratory specimen by NAA with probe detection               | 706159          |
| SARS-related coronavirus E gene [Presence] in Specimen by NAA with probe detection                                         | 706174          |
| SARS-CoV-2 (COVID-19) N gene [Presence] in Specimen by Nucleic acid amplification using CDC primer-probe set N1            | 706156          |
| SARS-CoV-2 (COVID-19) RNA [Cycle Threshold #] in Respiratory specimen by NAA with probe detection                          | 586528          |
| Measurement of Severe acute respiratory syndrome coronavirus 2 antigen                                                     | 37310257        |
| SARS-related coronavirus E gene [Cycle Threshold #] in Specimen by NAA with probe detection                                | 706166          |
| SARS-CoV-2 (COVID-19) Ag [Presence] in Upper respiratory specimen by Immunoassay                                           | 36032419        |
| SARS-CoV-2 (COVID-19) RNA panel - Specimen by NAA with probe detection                                                     | 706169          |
| SARS-CoV-2 (COVID-19) RNA [Presence] in Respiratory specimen by NAA with non-probe detection                               | 36031238        |

| Concept Name                                                                                                                | OMOP Concept Id |
|-----------------------------------------------------------------------------------------------------------------------------|-----------------|
| SARS-CoV-2 (COVID-19) RdRp gene [Presence] in Respiratory specimen by NAA with probe detection                              | 706160          |
| SARS-CoV-2 (COVID-19) N gene [Presence] in Nasopharynx by NAA with probe detection                                          | 715272          |
| SARS-CoV-2 (COVID-19) N gene [Presence] in Nose by NAA with probe detection                                                 | 757678          |
| SARS-CoV-2 (COVID-19) RNA [Presence] in Saliva (oral fluid) by Sequencing                                                   | 715261          |
| SARS-CoV-2 (COVID-19) RNA [Presence] in Specimen by NAA with probe detection                                                | 706170          |
| SARS-CoV-2 (COVID-19) N gene [Cycle Threshold #] in Specimen by Nucleic acid amplification using CDC primer-probe set N1    | 706157          |
| SARS-CoV-2 (COVID-19) ORF1ab region [Presence] in Respiratory specimen by NAA with probe detection                          | 723478          |
| SARS-related coronavirus N gene [Presence] in Specimen by Nucleic acid amplification using CDC primer-probe set N3          | 706171          |
| SARS-CoV+SARS-CoV-2 (COVID-19) Ag [Presence] in Respiratory specimen by Rapid immunoassay                                   | 757685          |
| SARS-CoV-2 (COVID-19) RNA [Presence] in Respiratory specimen by Sequencing                                                  | 36661377        |
| SARS-CoV-2 (COVID-19) N gene [Log #/volume] (viral load) in Respiratory specimen by NAA with probe detection                | 36661371        |
| SARS-CoV-2 (COVID-19) RdRp gene [Cycle Threshold #] in Respiratory specimen by NAA with probe detection                     | 723471          |
| SARS-CoV-2 (COVID-19) RdRp gene [Presence] in Upper respiratory specimen by NAA with probe detection                        | 36031453        |
| SARS-CoV-2 (COVID-19) RdRp gene [Presence] in Specimen by NAA with probe detection                                          | 706173          |
| SARS-CoV-2 (COVID-19) N gene [Presence] in Specimen by NAA with probe detection                                             | 706175          |
| SARS-CoV-2 (COVID-19) ORF1ab region [Cycle Threshold #] in Specimen by NAA with probe detection                             | 706168          |
| SARS-CoV-2 (COVID-19) N gene [Presence] in Respiratory specimen by Nucleic acid amplification using CDC primer-probe set N1 | 586524          |
| SARS-CoV-2 (COVID-19) ORF1ab region [Presence] in Specimen by NAA with probe detection                                      | 723464          |
| SARS-related coronavirus RNA [Presence] in Respiratory specimen by NAA with probe detection                                 | 706165          |
| SARS-CoV-2 (COVID-19) RNA panel - Saliva (oral fluid) by NAA with probe detection                                           | 36032061        |
| SARS-CoV-2 (COVID-19) RNA [Presence] in Respiratory specimen by NAA with probe detection                                    | 706163          |
| SARS-CoV-2 (COVID-19) specific TCRB gene rearrangements [Presence] in Blood by Sequencing                                   | 36031944        |



| Concept Name                                                                        | OMOP Concept Id |
|-------------------------------------------------------------------------------------|-----------------|
| SARS-CoV-2 (COVID-19) RNA [Presence] in Serum or Plasma by NAA with probe detection | 723463          |

## Suppl. Table 3

All indicators of COVID-19 infection (except for PCR and Antigen tests, Suppl. Table 3).

| Concept Name                                                                                    | Concept Id |
|-------------------------------------------------------------------------------------------------|------------|
| SARS-CoV-2 (COVID-19) IgG Ab [Presence] in Serum, Plasma or Blood by Rapid immunoassay          | 706181     |
| SARS-CoV-2 (COVID-19) IgA Ab [Units/volume] in Serum or Plasma by Immunoassay                   | 723459     |
| SARS-CoV-2 (COVID-19) IgM Ab [Presence] in Serum, Plasma or Blood by Rapid immunoassay          | 706180     |
| SARS-CoV-2 (COVID-19) IgM Ab [Presence] in DBS by Immunoassay                                   | 36659631   |
| SARS-CoV-2 (COVID-19) IgM Ab [Titer] in Serum or Plasma by Immunofluorescence                   | 36661373   |
| SARS-CoV-2 (COVID-19) neutralizing antibody [Presence] in Serum by pVNT                         | 757680     |
| SARS-CoV-2 (COVID-19) IgG+IgM Ab [Presence] in Serum or Plasma by Immunoassay                   | 723479     |
| SARS-CoV-2 (COVID-19) Ab panel - Serum, Plasma or Blood by Rapid immunoassay                    | 706176     |
| SARS-CoV-2 (COVID-19) IgG Ab [Titer] in Serum or Plasma by Immunofluorescence                   | 36661374   |
| SARS-CoV-2 (COVID-19) IgM Ab [Units/volume] in Serum or Plasma by Immunoassay                   | 706178     |
| SARS-CoV-2 (COVID-19) IgA Ab [Presence] in Serum or Plasma by Immunoassay                       | 723473     |
| SARS-CoV-2 (COVID-19) neutralizing antibody [Titer] in Serum by pVNT                            | 757679     |
| SARS-CoV-2 (COVID-19) Ab [Presence] in Serum or Plasma by Immunoassay                           | 586515     |
| SARS-CoV-2 (COVID-19) IgG Ab [Units/volume] in Serum or Plasma by Immunoassay                   | 706177     |
| SARS-CoV-2 (COVID-19) S protein RBD neutralizing antibody [Presence] in Serum or Plasma by sVNT | 36031734   |
| SARS-CoV-2 (COVID-19) IgA Ab [Titer] in Serum or Plasma by Immunofluorescence                   | 36661372   |
| SARS-CoV-2 (COVID-19) Ab [Units/volume] in Serum or Plasma by Immunoassay                       | 586522     |
| SARS-CoV-2 (COVID-19) IgA+IgM [Presence] in Serum or Plasma by Immunoassay                      | 757686     |
| Measurement of Severe acute respiratory syndrome coronavirus 2 antibody                         | 37310258   |
| SARS-CoV-2 (COVID-19) IgG Ab [Presence] in Serum or Plasma by Immunoassay                       | 723474     |
| SARS-CoV-2 (COVID-19) Ab panel - Serum or Plasma by Immunoassay                                 | 706179     |
| SARS-CoV-2 stimulated gamma interferon [Presence] in Blood                                      | 36031969   |
| SARS-CoV-2 stimulated gamma interferon release by T-cells [Units/volume] in Blood               | 36032309   |
| SARS-CoV-2 (COVID-19) IgA Ab [Presence] in Serum, Plasma or Blood by Rapid immunoassay          | 586521     |

| Concept Name                                                                                               | Concept Id |
|------------------------------------------------------------------------------------------------------------|------------|
| SARS-CoV-2 (COVID-19) Ab [Presence] in DBS by Immunoassay                                                  | 36031197   |
| SARS-CoV-2 (COVID-19) Ab [Presence] in Serum, Plasma or Blood by Rapid immunoassay                         | 36661369   |
| SARS-CoV-2 (COVID-19) IgM Ab [Presence] in Serum or Plasma by Immunoassay                                  | 723475     |
| SARS-CoV-2 (COVID-19) Ab [Interpretation] in Serum or Plasma                                               | 723480     |
| SARS-CoV-2 (COVID-19) IgG Ab [Presence] in DBS by Immunoassay                                              | 586527     |
| SARS-CoV-2 stimulated gamma interferon release by T-cells [Units/volume] corrected for background in Blood | 36031956   |

## Suppl. Table 4

All significant single-condition tests. Listed estimates are odds ratios for the given cohort pre-to-post compared to Controls, and p-values are adjusted across all condition tests for both cohorts (Bonferroni, prior to filtering to significance). Available at <https://doi.org/10.5281/zenodo.11188766>.

## Suppl. Table 5

Summary statistics for patients in the assessment set, with mean and standard deviation of condition era counts in pre- and post-infection phases. Note that the pre-infection phase covers 1 year of patient history, while the post-infection phase covers 6 months post-acute.

| Cohort  | Life Stage | Phase | Mean # Conditions | SD # Conditions | # Patients | # Sites |
|---------|------------|-------|-------------------|-----------------|------------|---------|
| Control | adolescent | post  | 10.296            | 10.373          | 10789      | 32      |
| Control | adolescent | pre   | 15.76             | 16.994          | 10789      | 32      |
| Control | adult      | post  | 17.518            | 18.525          | 180338     | 34      |
| Control | adult      | pre   | 27.794            | 29.446          | 180338     | 34      |
| Control | pediatric  | post  | 8.894             | 9.611           | 16029      | 32      |
| Control | pediatric  | pre   | 15.815            | 19.157          | 16029      | 32      |
| Control | senior     | post  | 25.357            | 24.142          | 95861      | 33      |
| Control | senior     | pre   | 40.438            | 36.562          | 95861      | 33      |
| COVID   | adolescent | post  | 10.311            | 12.376          | 3703       | 31      |
| COVID   | adolescent | pre   | 15.979            | 19.2            | 3703       | 31      |
| COVID   | adult      | post  | 17.177            | 18.777          | 60279      | 34      |
| COVID   | adult      | pre   | 28.432            | 31.169          | 60279      | 34      |

|       |            |      |        |        |       |    |
|-------|------------|------|--------|--------|-------|----|
| COVID | pediatric  | post | 10.074 | 12.872 | 3724  | 29 |
| COVID | pediatric  | pre  | 17.001 | 21.634 | 3724  | 29 |
| COVID | senior     | post | 24.847 | 24.162 | 21668 | 34 |
| COVID | senior     | pre  | 41.522 | 38.15  | 21668 | 34 |
| PASC  | adolescent | post | 23.287 | 22.347 | 66    | 20 |
| PASC  | adolescent | pre  | 18.893 | 21.219 | 66    | 20 |
| PASC  | adult      | post | 30.281 | 30.778 | 2047  | 32 |
| PASC  | adult      | pre  | 34.566 | 42.242 | 2047  | 32 |
| PASC  | pediatric  | post | 21.061 | 15.282 | 49    | 18 |
| PASC  | pediatric  | pre  | 19.755 | 15.492 | 49    | 18 |
| PASC  | senior     | post | 42.374 | 36.527 | 697   | 32 |
| PASC  | senior     | pre  | 50.292 | 51.6   | 697   | 32 |

## Suppl. Table 6

All topic-level logistic model tests. Estimates are odds ratios for the given cohort and demographic compared to Controls for the same demographic. Ratios where the demographic is listed as NA are for demographic contrasts independent of phase or cohort (model effectiveness checks, see main Methods). P-values are adjusted across all contrast tests (Holm). Available at <https://doi.org/10.5281/zenodo.11188766>.

## Suppl. Table 7

Source ICD code prefixes used to generate Quan-based comorbidity scores.

| ICD Prefixes                                                                                                                                                                   | Charleson Group                | Quan Score |
|--------------------------------------------------------------------------------------------------------------------------------------------------------------------------------|--------------------------------|------------|
| 'I21','I22','I252'                                                                                                                                                             | 1: Acute or historical MI      | 0          |
| 'I43','I50','I099','I110','I130','I132','I255','I420','I425','I426','I427','I428','I429','P290'                                                                                | 2: CHF                         | 2          |
| 'I70','I71','I731','I738','I739','I771','I790','I792','K551','K558','K559','Z958','Z959'                                                                                       | 3: Peripheral vascular disease | 0          |
| 'G45','G46','I60','I61','I62','I63','I64','I65','I66','I67','I68','I69','H340'                                                                                                 | 4: Cerebrovascular disease     | 0          |
| 'F00','F01','F02','F03','G30','F051','G311'                                                                                                                                    | 5: Dementia                    | 2          |
| 'J40','J41','J42','J43','J44','J45','J46','J47','J60','J61','J62','J63','J64','J65','J66','J67','I278','I279','J684','J701','J703'                                             | 6: COPD                        | 1          |
| 'M32','M33','M34','M06','M05','M315','M351','M353','M360'                                                                                                                      | 7: Rheumatic disease           | 1          |
| 'K25','K26','K27','K28'                                                                                                                                                        | 8: Peptic ulcer                | 0          |
| 'B18','K73','K74','K700','K701','K702','K703','K709','K717','K713','K714','K715','K760','K762','K763','K764','K768','K769','Z944'                                              | 9: Mild liver disease          | 2          |
| 'E100','E101','E106','E108','E109','E110','E111','E116','E118','E119','E120','E121','E126','E128','E129','E130','E131','E136','E138','E139','E140','E141','E146','E148','E149' | 10: Diabetes                   | 0          |

|                                                                                                                                                                                                                                                                                                                                                                                                                                                                                                                   |                                         |   |
|-------------------------------------------------------------------------------------------------------------------------------------------------------------------------------------------------------------------------------------------------------------------------------------------------------------------------------------------------------------------------------------------------------------------------------------------------------------------------------------------------------------------|-----------------------------------------|---|
| 'E102','E103','E104','E105','E107','E112','E113','E114','E115','E117','E122','E123','E124','E125','E127','E132','E133','E134','E135','E137','E142','E143','E144','E145','E147'                                                                                                                                                                                                                                                                                                                                    | 11: Diabetes with chronic complications | 1 |
| 'G81','G82','G041','G114','G801','G802','G830','G831','G832','G833','G834','G839'                                                                                                                                                                                                                                                                                                                                                                                                                                 | 12: Paralysis                           | 2 |
| 'N18','N19','N052','N053','N054','N055','N056','N057','N250','I120','I131','N032','N033','N034','N035','N036','N037','Z490','Z491','Z492','Z940','Z992'                                                                                                                                                                                                                                                                                                                                                           | 13: Renal disease                       | 1 |
| 'C00','C01','C02','C03','C04','C05','C06','C07','C08','C09','C10','C11','C12','C13','C14','C15','C16','C17','C18','C19','C20','C21','C22','C23','C24','C25','C26','C30','C31','C32','C33','C34','C37','C38','C39','C40','C41','C43','C45','C46','C47','C48','C49','C50','C51','C52','C53','C54','C55','C56','C57','C58','C60','C61','C62','C63','C64','C65','C66','C67','C68','C69','C70','C71','C72','C73','C74','C75','C76','C81','C82','C83','C84','C85','C88','C90','C91','C92','C93','C94','C95','C96','C97' | 14: Localized cancer/leukemia/lymphoma  | 2 |
| 'K704','K711','K721','K729','K765','K766','K767','I850','I859','I864','I982'                                                                                                                                                                                                                                                                                                                                                                                                                                      | 15: Moderate/severe liver disease       | 4 |
| 'C77','C78','C79','C80'                                                                                                                                                                                                                                                                                                                                                                                                                                                                                           | 16: Metastatic cancer                   | 6 |
| 'B20','B21','B22','B24'                                                                                                                                                                                                                                                                                                                                                                                                                                                                                           | 17: HIV/AIDS                            | 4 |
